# Supplementary material
Source: PubMed Central journal article supplement (PMC2850257)
Supplement: NIHMS188623-supplement-Figure_S1.pdf [file NIHMS188623-supplement-Figure_S1.pdf]

```

E_coli      LRGPSISIACTACTSGVHNIGHAARI IAYGDADVMVAGGAEKASTPLGVGGFGAARALSTR 212
Rlegum_1    TRGLPVTLSACASGVTAIQLGIEAIRQGRTRTRALTVATDGSLSAEALIRFSLLSALSTQ 226
Rlegum_2    VTGSSRTFMGEEAAGISAVETAFAFYRIKSGESSHALVGGAFAAERPDMILLTEAIGAHARG 224
           * . ::      :*: : . * * : .. .. : . : * :

E_coli      NDNPQAASRPWDKERDGFVLDGAGMLVLEEYEHAKKRGAKIYAELVGFMSDDAYHMTS 272
Rlegum_1    NDPPTASKPFSKDRDGFVIAEGAATLVLESLESAVARGAKVLGIMKGAGDKADSFHRTR 286
Rlegum_2    DWVPLWSRKPS--DGGGMITGSAGAFVLVLESRKHAARGAHIYAVVD-----AVEGDR 275
           : * : :* : .*: : ..... ****. : * ***: : . :

E_coli      PPENGAGAALAMANALRDAGIEASQIGYVNAHGTSTPAGDKAEQAVKTIFGEAASRVLV 332
Rlegum_1    SSPDGGPAIATIRAALADAGMSEGDIGYINAHGTSTPENDKMEYGSMSAVFGEKLVGIPV 346
Rlegum_2    GNRNSGNLEVRLERLLLGPAAGLAAESTAFSGSTGMHDLAAREER----AVLEHQLPGVAI 331
           :.. : * *. : : : .* . * : : . : :

E_coli      SSTKSMTGHLLGAAGAVESIYSILALRDQAVPPTINLDNPDEGCDLDFVPHEARQVSGME 392
Rlegum_1    SSNKSMIGHTLTAAGAVEAVFSLQTMLTGTLPPTINYNNPDPSIILDVVPNKKKREAQ-VS 405
Rlegum_2    RGFGGVTGHTIETQFTLGLALAAALAVDGKAKVPPFDA-----AHEAPMRAGAT 379
           . .: ** : : : : : : : * : : : :

E_coli      YTLCONSFGFGGTNGSLIFKKI-- 413
Rlegum_1    AVLSNSFGFGGQNASLVMLEPA 428
Rlegum_2    AAVVTTVGHQRGEGVAVLSANA- 401
           .: :.*. :. : :

```

***Rhizobium leguminosarum* biovar *viciae* 3841, deficient in 27-hydroxyoctacosanoate-modified lipopolysaccharide, is impaired in desiccation tolerance, biofilm formation and motility**

**By:** Elizabeth M. Vanderlinde, Artur Muszyński, Joe J. Harrison, Susan F. Koval, Dallas L. Foreman, Howard Ceri, Elmar L. Kannenberg, Russell W. Carlson and Christopher K. Yost

**Supplementary Fig. 1(a)**

|           |                                                          |     |
|-----------|----------------------------------------------------------|-----|
| Rlegum    | IDWSQQIAKRGDQRQMENWQRIGVFAAGLALDDAGFKDDIEACGTMDMIVAAGGG  | 110 |
| Rtrifolii | IDWSQQIAKRGDQRQMENWQRIGVFAAGLALDDAGFKDDIEACGTMDMIVAAGGG  | 110 |
| Retli     | IDWSQQIAKRGDQRQMENWQRIGVFAAGLALDDAGFKDNEACGTMDMIVAAGGG   | 110 |
| Agrobac   | IDWSAQIAKRGDQRQMENWQRLGVFAAGLALDDAGLKENTEACATMDMIVAAGGG  | 109 |
| Sinorhiz  | IDWSQQIPKRGDQRQMENWQRLGVFAAGLALDDAGLKDSLEACGSMDMIVAAGGG  | 110 |
| Bart      | VDWNLQIPKRSRQRMGTWQRLGTYAAGLALDDAGMKNNQLTSTMDMIIAAGGG    | 107 |
| B_suis    | VDWSLQIPKRGDQRQMETWQRLGTYAAGLALQDAGMKGDEALCATMDMIVGAGGG  | 107 |
| M_loti    | IDWNLQIAKRGDQRQMETWQRLGTYAAGLALDDAGIKGNDELCTTMDMVVAAGGG  | 108 |
| Brady     | VSFDSQIPKKGDRQMEAWQRIGTYAAGLALDSAGIKGNKDILSKIDMVVAAGGG   | 112 |
|           | :.:. *.*.:.***** ***:*.:.*****:.*:* . .:***:..****       |     |
|           |                                                          |     |
| Rlegum    | ERDINVDTLIVDEALKRNDRELLNEKLTTELRLPTLFLAQLSNLLAGNISIVHKV  | 165 |
| Rtrifolii | ERDINVDTLIVDEALKRNDRELLNEKLTTELRLPTLFLAQLSNLLAGNISIVHKV  | 165 |
| Retli     | ERDINVDTLIVDEGLKRNDRELLNEKLTTELRLPTLFLAQLSNLLAGNISIVHKV  | 165 |
| Agrobac   | ERDINVDTLIVDEALKRNDREKLLNEKLTTELRLPTLFLAQLSNLMAGNISIVHKV | 164 |
| Sinorhiz  | ERDINVDSLIVDEALKRNDRELLNEKLTTELRLPTLFLAQLSNLLAGNISIVHKV  | 165 |
| Bart      | ERDIVVDTQILSKARRVADHASMLNSILSTELRLPTLFLAQLSNLLAGNISIVHKV | 162 |
| B_suis    | ERDITVDMQILEEGRTSNNRGVMLEKLTTELRLPTLFLAQLSNLLAGNISIVHKV  | 162 |
| M_loti    | ERDEAVDAAILAASESRNDRDVLLEKLTTELRLPTLFLAQLSNLLAGNISIVHKV  | 163 |
| Brady     | ERDLNVDTGVLTAEAKGANAPGFLNERLMSDLRPTLFLAQLSNLLAGNIAIVHGL  | 167 |
|           | *** ** :: : : ** . * :*****:***:*** :                    |     |
|           |                                                          |     |
| Rlegum    | TGSSRTFMGEEAAGISAVETAFYRIKSGESSHALVGGAFAAERPDMILLTEAIGA  | 222 |
| Rtrifolii | TGSSRTFMGEEAAGISAVETAFYRIKSGESSHALVGGAFAAERPDMILLTEAIGA  | 222 |
| Retli     | TGSSRTFMGEEASGVSAVETAFWRIRSGESTHALVGGAFAAERPDMILLTEAIGA  | 222 |
| Agrobac   | TGSSRTFMGEEAAGISAVETAFHRIRSGESSHALVGGAFSAERPDMILLFEAIGA  | 221 |
| Sinorhiz  | TGSSRTFMGEEAAGISAIETAFARIKAGQSSHTLVGGAFSAERLDIVLMIEAIOG  | 222 |
| Bart      | TGSSRTFMGEEGCLSAIQIAAARIRSGQSTHALVGGSYNAQSYDMLLAHELGLL   | 219 |
| B_suis    | TGSSRTFMGEEGSGISAIETAAARIRTGQSTHALVGGSYNAEHFDMILGAELGLL  | 219 |
| M_loti    | TGSSRTFMGEEGAGVSAVETAAARIRSGQSTHVLVGGAFQTEHSDMLLGYELAGY  | 220 |
| Brady     | GGTSRTFMGEEVAGADAARIALARIASGESDIALIGGSHNGERKDLMLVLYEFGDF | 224 |
|           | *:***** .* .* . * ** :*:* .*:*. . : *::: *               |     |

***Rhizobium leguminosarum* biovar *viciae* 3841, deficient in 27-hydroxyoctacosanoate-modified lipopolysaccharide, is impaired in desiccation tolerance, biofilm formation and motility**

**By:** Elizabeth M. Vanderlinde, Artur Muszyński, Joe J. Harrison, Susan F. Koval, Dallas L. Foreman, Howard Ceri, Elmar L. Kannenberg, Russell W. Carlson and Christopher K. Yost

**Supplementary Fig. 1(b)**
