# Supplementary material
Source: PubMed Central journal article supplement (PMC2850257)
Supplement: NIHMS188623-supplement-Supplementary_Table_S1.pdf [file NIHMS188623-supplement-Supplementary_Table_S1.pdf]

***Rhizobium leguminosarum* biovar *viciae* 3841, deficient in 27-hydroxyoctacosanoate-modified lipopolysaccharide, is impaired in desiccation tolerance, biofilm formation and motility**

**By:** Elizabeth M. Vanderlinde, Artur Muszyński, Joe J. Harrison, Susan F. Koval, Dallas L. Foreman, Howard Ceri, Elmar L. Kannenberg, Russell W. Carlson and Christopher K. Yost

**Supplementary Table S1.** Sequences of primers used

| Primer   | Sequence (5'–3')                  | Reference                               |
|----------|-----------------------------------|-----------------------------------------|
| FabF1F   | ATCCTAGGGCAAATGCGTGAGGAGTG        | This study                              |
| FabF1R   | TAGGATCCCTTGAAATTGTCGGAAAC        | This study                              |
| FabZ     | CACCATGCCGTTTTCCGA                | This study                              |
| FabF2R   | CGGATAGGGCTTGAACCT                | This study                              |
| FabF2F   | GTGGCTTCGGCGGCGTTA                | This study                              |
| FabF1RTF | TTCCGCTTATAGAGATCA                | This study                              |
| FabF1RTR | GCGGGCAAAGGCATAGGA                | This study                              |
| RL2813F  | TGCACGGCTTCCATCTCG                | This study                              |
| RL2813R  | CGGTCGGTGCGGTAGTTG                | This study                              |
| DegTaqI  | CCAGTGAGCAGAGTGACGIIIIINNSWGTCGAA | This study                              |
| Q0       | CCAGTGAGCAGAGTGACG                | González-Ballester <i>et al.</i> (2005) |
| TGN1     | CCTTCACCCTCTCCACTG                | This study                              |
| TGN2     | CCCATTAACATCACCATC                | This study                              |
| ndvBF    | GCGGTACCTCGTTCACCCCGGCTTCA        | This study                              |
| ndvBR    | TTTCCTTCTCGTTTTCT                 | This study                              |

**REFERENCE**

**González-Ballester, D., de Montaigu, A., Galvan, A. & Fernandez, E. (2005).** Restriction enzyme site-directed amplification PCR: a tool to identify regions flanking a marker DNA. *Anal Biochem* **340**, 330–335.
